# Supplementary material
Source: PubMed Central journal article supplement (PMC4019247)
Supplement: jdi-3-464-s1.pdf [file jdi-3-464-s1.pdf]

# Figure S1 Iwasaki et al.

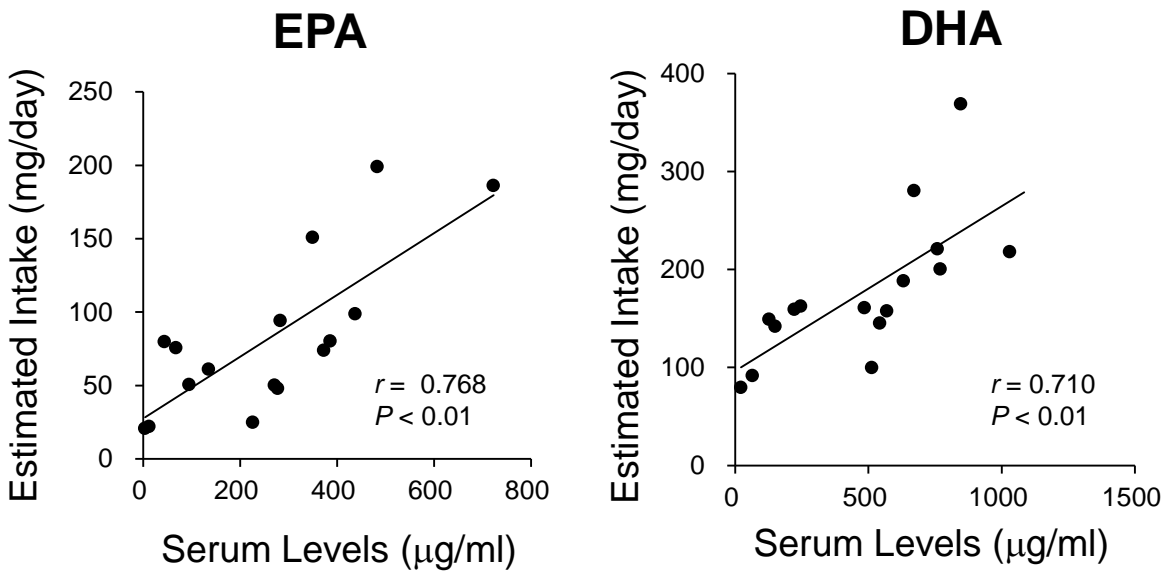

Figure S1. Correlation between estimated intakes and serum concentrations of eicosapentaenoic acid (EPA) and docosahexaenoic (DHA) (n=16). Linear regression analyses were carried out to calculate the correlation coefficient (r) and P-values.
